# Supplementary material for: Hierarchical Ni2P/Cr2CTx(MXene) composites with oxidized surface groups as efficient bifunctional electrocatalysts for overall water splitting
Source: Royal Society of Chemistry journal article supplement (doi:10.1039/c9ta00008a), 2019-01-01
Supplement: c9ta00008a1.pdf [file c9ta00008a1.pdf]

Supplementary Information

**Hierarchical Ni<sub>2</sub>P/Cr<sub>2</sub>CT<sub>x</sub> (MXene) composites with oxidized surface groups as efficient bifunctional electrocatalysts for overall water splitting**

Yuwen Cheng,<sup>1</sup> Yumin Zhang,<sup>1,3</sup> Yue Li,<sup>2</sup> Jianhong Dai,<sup>2</sup> and Yan Song<sup>\*, 2</sup>

**1** National Key Laboratory of Science and Technology for National Defence on Advanced Composites in Special Environments, Harbin Institute of Technology, Harbin, 150001, PR China

**2** School of Materials Science and Engineering, Harbin Institute of Technology at Weihai, 2 West Wenhua Road, Weihai, 264209, PR China

**3** Harbin Institute of Technology at Shenzhen, Shenzhen, 518055, PR China

Corresponding author, E-mail: sy@hitwh.edu.cn

---

\*Corresponding author, E-mail: sy@hitwh.edu.cn

## 1. Calculation method of HER and OER activity

### 1.1 Gibbs free energy of hydrogen adsorption

Under standard conditions, the HER catalytic activity of materials can be evaluated by the change of the Gibbs reaction free energy of hydrogen adsorption ( $\Delta G_{H^*}$ ).  $\Delta G_{H^*}$  can be evaluated by eq (S1),

$$\Delta G_{H^*} = \Delta E_H + \Delta E_{ZPE} - T\Delta S_H \quad (S1)$$

where  $\Delta E_H$ ,  $\Delta E_{ZPE}$  and  $T\Delta S_H$  are the differences of hydrogen adsorption energy, zero-point energy and the entropy between adsorbed hydrogen and hydrogen in the gas phase, respectively.  $\Delta E_H$  is defined as

$$\Delta E_H = E_{DFT}^{nH^*} - E_{DFT}^{(n-1)H^*} - \frac{1}{2} E_{DFT}^{H_2(g)} \quad (S2)$$

where  $E^{nH^*}$ ,  $E^{(n-1)H^*}$ , and  $E_{H_2}$  represent total energies of the catalyst with n adsorbed hydrogen atoms, n-1 adsorbed hydrogen atoms, and  $H_2$  gas, respectively. The asterisk denotes the catalytic active sites.  $\Delta E_{ZPE}$  can be calculated by eq (S3)

$$\Delta E_{ZPE} = E_{ZPE}^{nH} - E_{ZPE}^{(n-1)H} - \frac{1}{2} E_{ZPE}^{H_2} \quad (S3)$$

The  $\Delta S_H$  can be approximated as eq (S4)

$$\Delta S_H \cong -\frac{1}{2} S_{H_2}^0 \quad (S4)$$

due to the fact that the vibrational entropy in the adsorbed state is small according to previous studies,<sup>1</sup> and  $S_{H_2}^0$  is the entropy of  $H_2$  gas under the standard condition.<sup>2</sup> Here, the values of  $\Delta E_{ZPE}$  and  $T\Delta S$  are referenced from Ref 2. Therefore, eq S1 can be written as eq S5

$$\Delta G_{H^*} = \Delta E_H + 0.3 \text{ eV} \quad (S5)$$

The optimal  $\Delta G_{H^*}$  value for HER is  $\Delta G_{H^*} = 0$ , which means that the smaller values of  $|\Delta G_{H^*}|$ , the better HER performance of catalysts.

### 1.2 Volcano curve

To get exchange current, we adopted Nørskov's assumption.<sup>1</sup> When the proton transfer is exothermic ( $\Delta G_{H^*} < 0$ ), the expression for the exchange current at pH=0 is:

$$i_0 = -ek_0 \frac{1}{1 + \exp(-\Delta G_{H^*}/k_B T)} \quad (S6)$$

For another case, if the proton transfer is endothermic ( $\Delta G_{H^*} > 0$ ), under the same condition as above, the exchange current is

$$i_0 = -ek_0 \frac{1}{1 + \exp(\Delta G_{H^*}/k_B T)} \quad (S7)$$

Where the  $k_0$  is the rate constant and  $k_B$  is the Boltzmann constant, and  $k_0$  is the rate constant, which is set as 1 owing to the lack of available experimental data.<sup>3</sup>

For hydrogen evolution reaction, the overpotential is defined as the negative of absolute value of the difference of free energy of hydrogen adsorption. The theoretical calculation overpotential is defined as  $\eta_{HER} = -|\Delta G_{H^*}|/e \times 10^3$  in unit of mV. The optimum free energy for HER is 0 eV, and the corresponding overpotential is 0 mV.<sup>4</sup>

### 1.3 Calculation of standard free energy diagram for oxygen evolution reaction

The relation between Gibbs free energy ( $G$ ) and DFT energy ( $E_{DFT}$ ) are constructed on the following thermodynamic approximations.<sup>5-7</sup> Hydrogen electrode is assumed to be in equilibrium

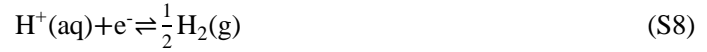

Thus,

$$\mu_{H^+}^0 + \mu_e^0 = \frac{1}{2} \mu_{H_2(g)}^0 \quad (S9)$$

The experimental value of 2.46 eV of standard Gibbs free energy changed of the reaction:

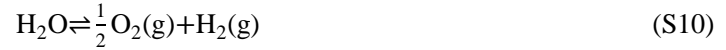

Thereby,

$$\mu_{H_2(g)}^0 + \frac{1}{2} \mu_{O_2(g)}^0 - \mu_{H_2O(l)}^0 = 2.46 \text{ eV} \quad (S11)$$

$\mu_{H^+}^0$ ,  $\mu_e^0$ ,  $\mu_{H_2(g)}^0$  and  $\mu_{H_2O(l)}^0$  represent the chemical potential of protons, electrons and hydrogen and water at standard conditions, respectively. By definition,  $G = H - TS$ , where  $G$  is Gibbs free energy which can also be represented by chemical potential  $\mu$ ,  $H$  is the enthalpy of the system, which equals to  $E_{DFT}$  corrected by the zero-point energy (ZPE).  $S$  is the entropy of the system. The ZPE and entropy at 298 K ( $TS$ ) were retrieved from Ref. 6. As a results,

$$G = E_{DFT} + ZPE - TS \quad (S12)$$

At a standard condition ( $T=298.15K$ ,  $P=0.035\text{bars}$ ), the approximation chemical potentials of  $H_2$  molecule and  $H_2O$  molecule can be defined as:

$$\frac{1}{2} \mu_{H_2(g)}^0 = \frac{1}{2} (E_{DFT}^{H_2} + ZPE_{H_2(g)} - TS_{H_2(g)}^0) \quad (S13)$$

$$\mu_{H_2O(l)}^0 \approx \mu_{H_2O(g)} = E_{DFT}^{H_2O(g)} + ZPE_{H_2O(g)} - TS_{H_2O}^0(0.035\text{bars}) \quad (S14)$$

The proposed mechanism for OER consist of four intermediate steps at standard conditions under electrode potential  $U$  are considered, each step on the active sites release of a proton and an electron:

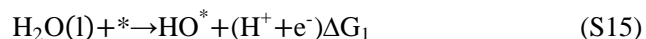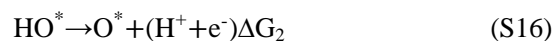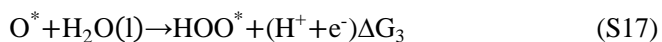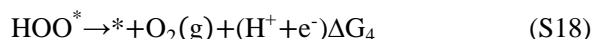

Where  $\text{O}^*$ ,  $\text{OH}^*$ ,  $\text{OOH}^*$  are the adsorbed intermediates,  $*$  represent active sites on the catalysts surface, (l) and (g) refer to liquid and gas phases, respectively.  $\Delta G_1$ ,  $\Delta G_2$ ,  $\Delta G_3$  and  $\Delta G_4$  are the free energy of reaction (S15)-(S18). The overpotential of OER processes can be determined by calculating the reaction free energies of the four different steps. The thermo-chemistry of these electrochemical reactions was obtained by using DFT calculation combined with SHE model developed by Nørskov and co-work.<sup>8</sup> The thermodynamic approach establishes a minimum set of requirements for the reactions based on the binding of the intermediates and the assumption that there are no extra barriers from adsorption or dissociation of  $\text{O}_2$  or proton/electron transfer reactions. In our calculations, the OER were analyzed using intermediate species associated with one electrons transfer at a time. In OER, the rate determining steps can either be the formation of  $\text{O}^*$  from  $\text{OH}^*$ (Eq.(S16)) or formation of  $\text{O}^*$  to  $\text{OOH}^*$ (Eq.(S17)).<sup>6</sup> The adsorption energy of  $\text{O}^*$ ,  $\text{OH}^*$  and  $\text{OOH}^*$  are calculated as follows<sup>5</sup>:

$$\Delta E_{\text{HO}^*} = E(\text{HO}^*) - E(*) - (E_{\text{H}_2\text{O}} - \frac{1}{2} E_{\text{H}_2}) \quad (\text{S19})$$

$$\Delta E_{\text{OOH}^*} = E(\text{HOO}^*) - E(*) - (2E_{\text{H}_2\text{O}} - \frac{3}{2} E_{\text{H}_2}) \quad (\text{S20})$$

$$\Delta E_{\text{O}^*} = E(\text{O}^*) - E(*) - (E_{\text{H}_2\text{O}} - E_{\text{H}_2}) \quad (\text{S21})$$

where  $E(*)$ ,  $E(\text{O}^*)$ ,  $E(\text{HO}^*)$  and  $E(\text{HOO}^*)$  are the calculated energies of clean catalysts ( $\text{Ni}_2\text{P}$  or  $\text{Ni}_2\text{P}/\text{Cr}_2\text{CO}_2$ ) surface, and surface adsorbed with  $\text{O}^*$ ,  $\text{HO}^*$ , and  $\text{HOO}^*$ , respectively.  $E_{\text{H}_2\text{O}}$  and  $E_{\text{H}_2}$  are the calculated energies of  $\text{H}_2\text{O}$  and  $\text{H}_2$  molecules in the gas phase. Considering the ZPE and entropy corrections, the free energies of adsorption,  $\Delta G_{\text{ads}}$ , can obtained by following equation:

$$\Delta G_{\text{ads}} = \Delta E + \Delta \text{ZPE} - T\Delta S \quad (\text{S22})$$

For each step, the reaction free energy  $\Delta G$  is defined as the difference between free energies of the

initial and final states, and is given by the expression:

$$\Delta G = \Delta E + \Delta ZPE - T\Delta S - eU - k_B T \ln H^+ \quad (S23)$$

Where  $\Delta E$  is the change of energy after adsorbed intermediate species,  $U$  is the potential at the electrode. The free energy of reaction (S15)-(S18) can be calculated using Eq.(S23). The values of  $\Delta E_{ZPE}$  and  $T\Delta S$  of intermediate adsorbates ( $O^*$ ,  $HO^*$ ,  $HOO^*$ ) are referenced from Ref 6. The theoretical onset overpotential  $\eta$ , which is determined by the potential limiting steps (PLS), can be obtained from the following equation.<sup>9</sup>

$$\eta = \max(\Delta G_1, \Delta G_2, \Delta G_3, \Delta G_4) / e - 1.23 [V] \quad (S24)$$

The value of  $\eta$  is independent of pH. The ideal case for scaling relation requires  $\Delta G_3 = -\Delta G_2 + 2.46$  [eV], where  $\Delta G_3$  is the free energy change of water dissociation on top of  $O^*$  and  $\Delta G_2$  is the free energy change of proton removal from  $HO^*$ , the linear scaling relation of our calculation was about fitted to  $\Delta G_3 = -1.33\Delta G_2 + 4.14$  [eV] for  $Ni_2P$  surface.

## 2. Calculation method of surface energy and interface binding energy

The surface energy of  $Ni_2P$  surface can be obtained as:

$$\gamma = [G_{slab} - \sum_i N_i \mu_i] / 2A \quad (S25)$$

where  $G_{slab}$  is the Gibbs free energy of the slab,  $N_i$  is the number of each component  $i$  within the slab, and  $\mu_i$  is the chemical potential of component  $i$  per formula unit.  $A$  is the surface area of the slab, and the factor 1/2 indicates that there are two surface per slab.<sup>9</sup> The  $Ni_2P/Cr_2CO_2$  interface binding energy can be defined as<sup>10</sup>:

$$E_{ads} = [E_{Ni_2P/Cr_2CO_2} - E_{Ni_2P} - E_{Cr_2CO_2}] / S \quad (S26)$$

where  $E_{Ni_2P/Cr_2CO_2}$  is the total energy of  $Ni_2P/Cr_2CO_2$  interface,  $E_{Ni_2P}$  and  $E_{Cr_2CO_2}$  represents the total energy of the isolated and relaxed  $Ni_2P$ ,  $Cr_2CO_2$  slabs in the same supercell, respectively.  $S$  is the interface area. When calculated  $E_{Ni_2P}$  or  $E_{Cr_2CO_2}$ , one part of the interface system kept fixed, and the other part was removed.

## 2. Figures and tables

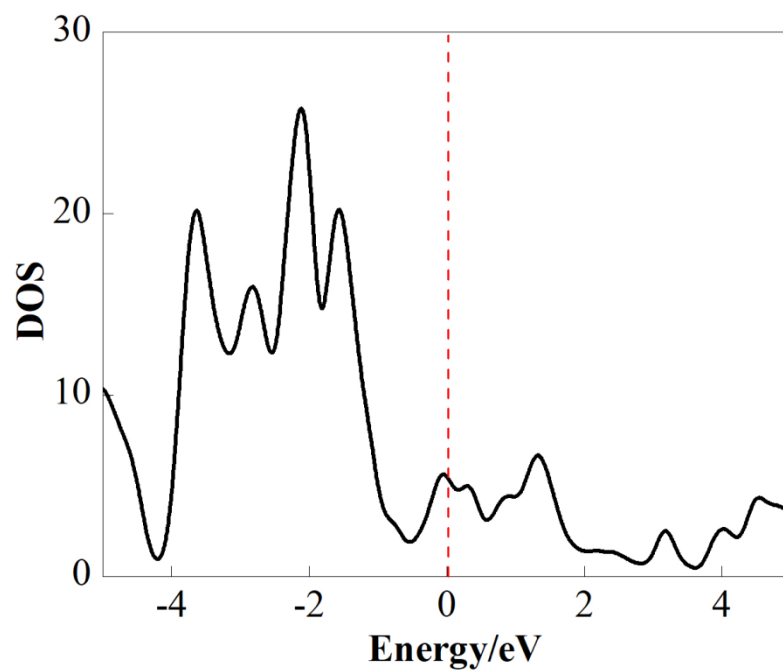

**Figure S1.** Total density of states of (TDOS) bulk  $\text{Ni}_2\text{P}$ .

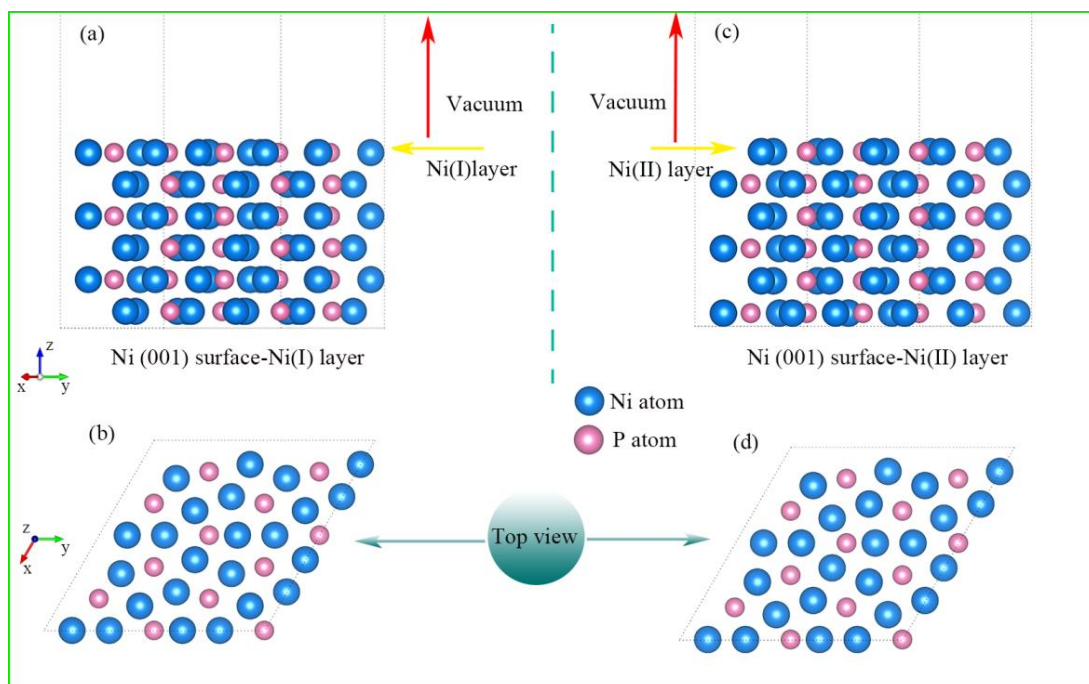

**Figure S2.** Schematic of  $\text{Ni}_2\text{P}$  (001) surface structure after relaxation, side (a) and top (b) view of Ni (I) termination, side (c) and top (d) view of Ni(II) termination.

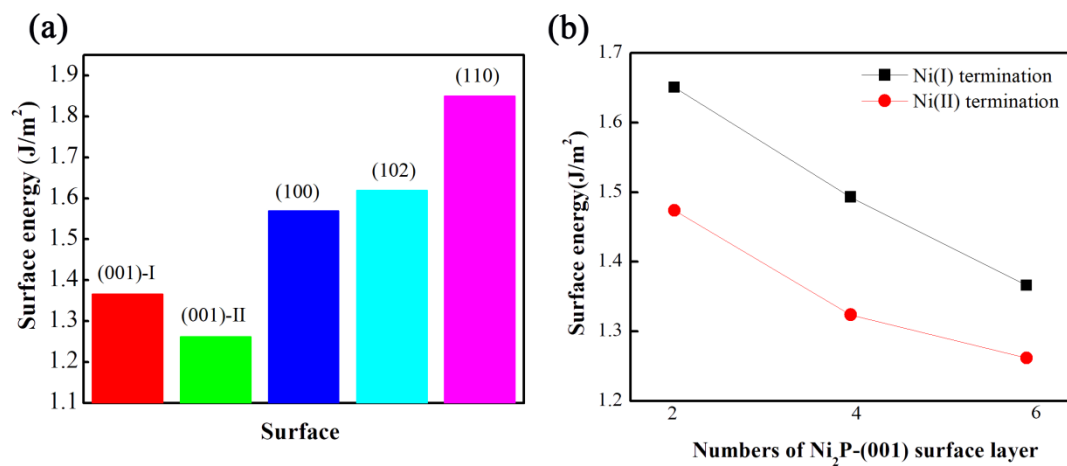

**Figure S3.** The calculated surface energies of (a) different Ni<sub>2</sub>P surface and (b) Ni<sub>2</sub>P (001) surface energies as function of number of surfaces layer.

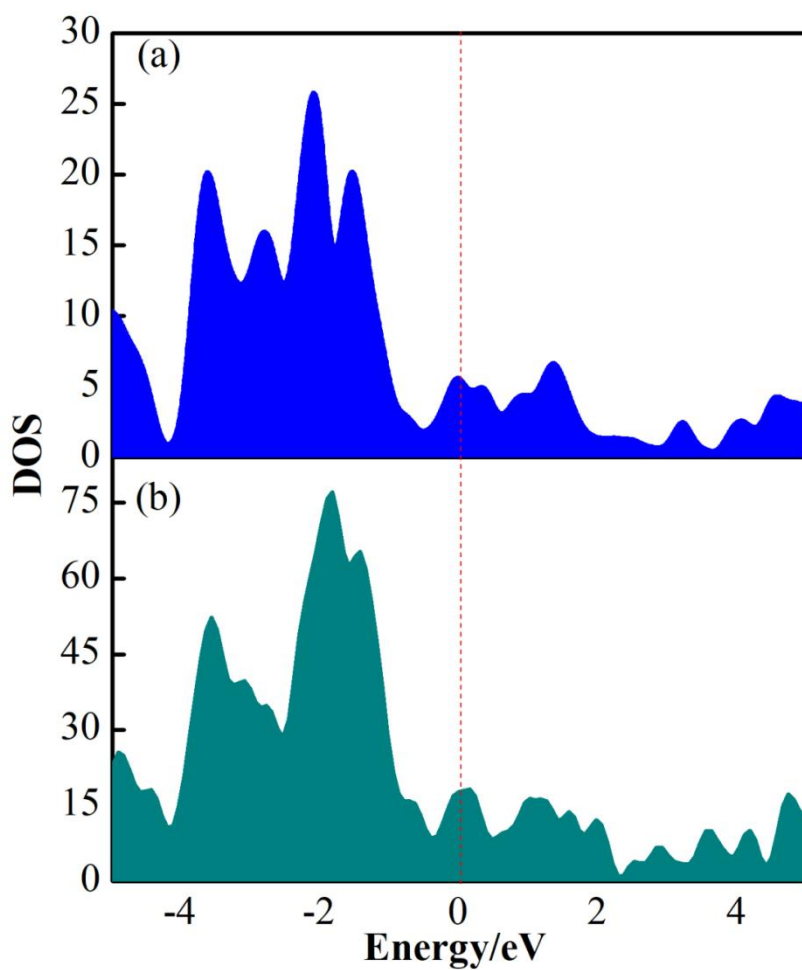

**Figure S4.** Density of states of (a) Ni<sub>2</sub>P bulk and (b) Ni<sub>2</sub>P (001) surface.

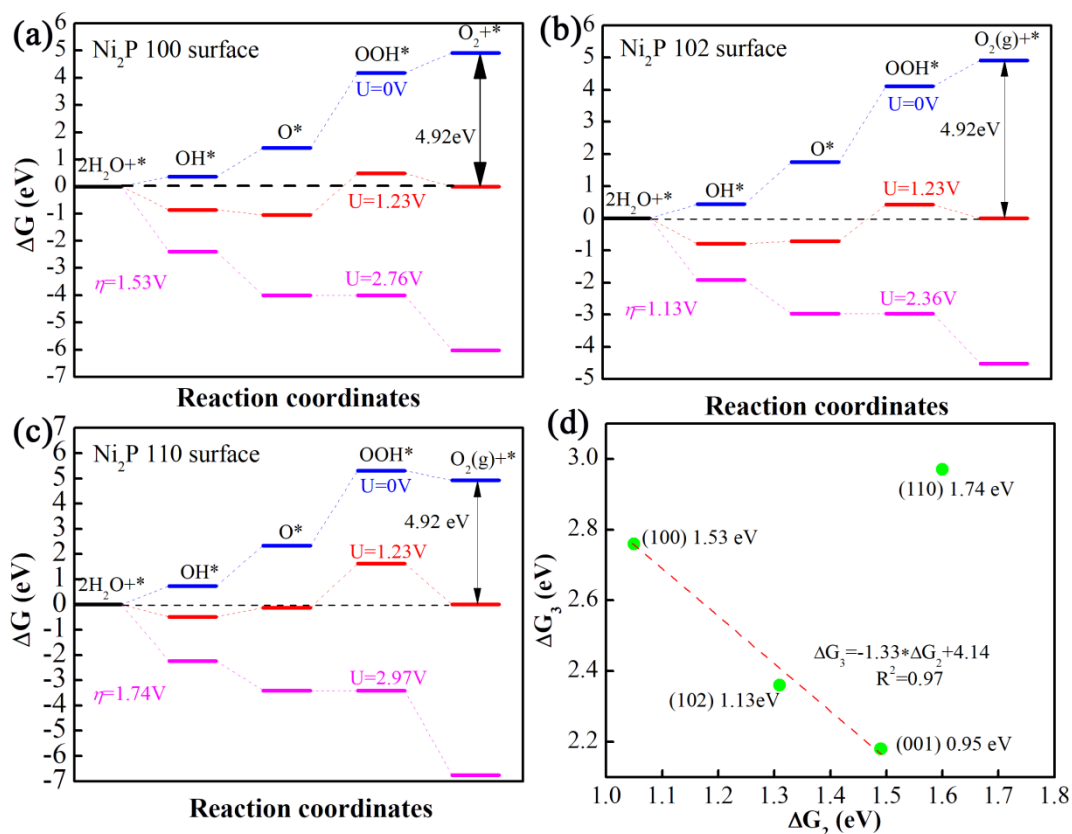

**Figure S5.** Standard free energy diagrams for OER at different electrode potentials  $U$  for different Ni<sub>2</sub>P surface, (a) Ni<sub>2</sub>P 100 surface, (b) Ni<sub>2</sub>P 102 surface, (c) Ni<sub>2</sub>P 110 surface. Blue lines for zero potential: 0 V. Red lines at the equilibrium potential of oxygen evolution  $U = 1.23$  V for standard hydrogen electrode (SHE), pink lines for potentials of all downhill reaction steps. (d) The calculated onset overpotentials as function of free energy changes ( $\Delta G_2$  and  $\Delta G_3$ ) with the reaction intermediates of different surfaces.



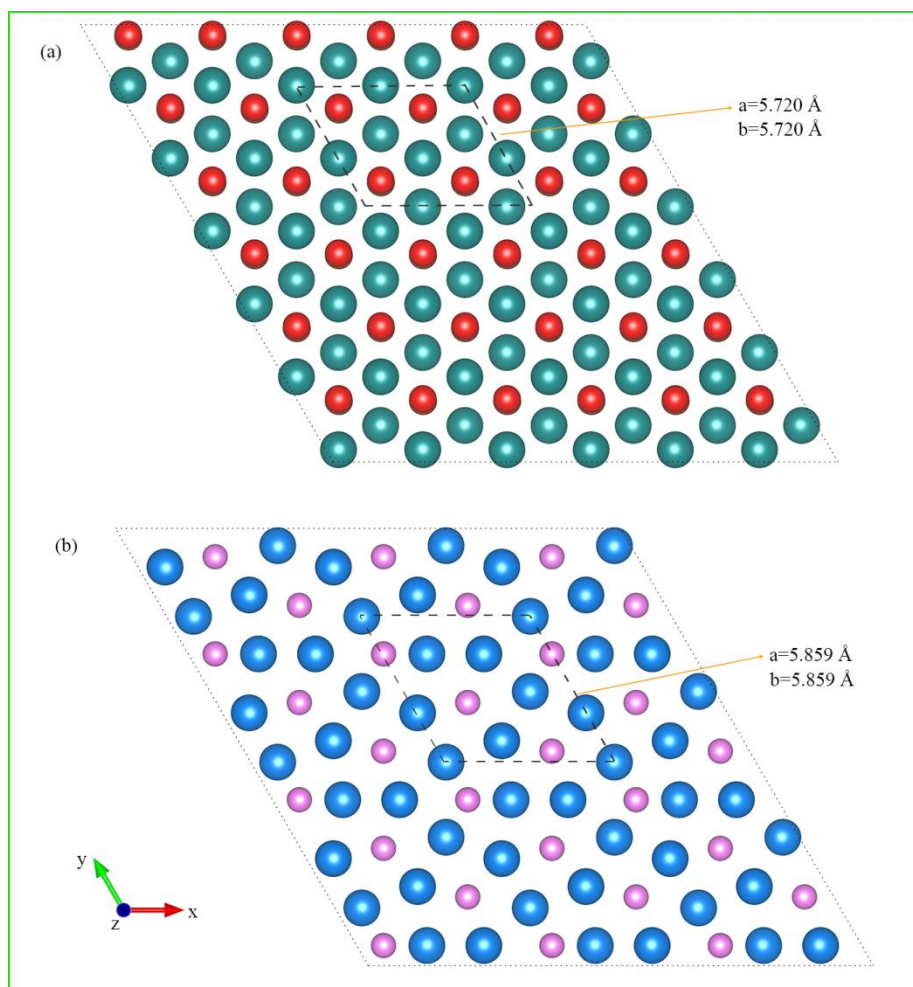

**Figure S6.** The lattice matching of  $\text{Cr}_2\text{CO}_2/\text{Ni}_2\text{P}$  interface. (a)  $\text{Cr}_2\text{CO}_2$  and (b)  $\text{Ni}_2\text{P}$  (001) surface. The unit of lattice parameter is  $\text{\AA}$ .

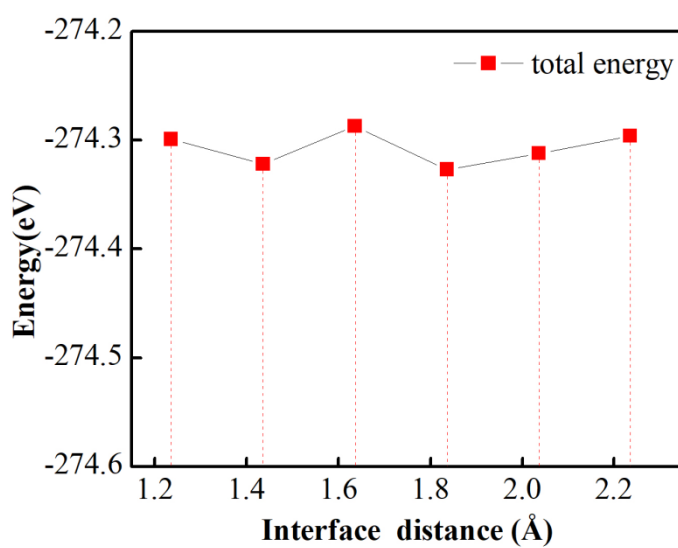

**Figure S7.** The total energy of  $\text{Cr}_2\text{CO}_2/\text{Ni}_2\text{P}$  interface (red box) varies with interface distance.

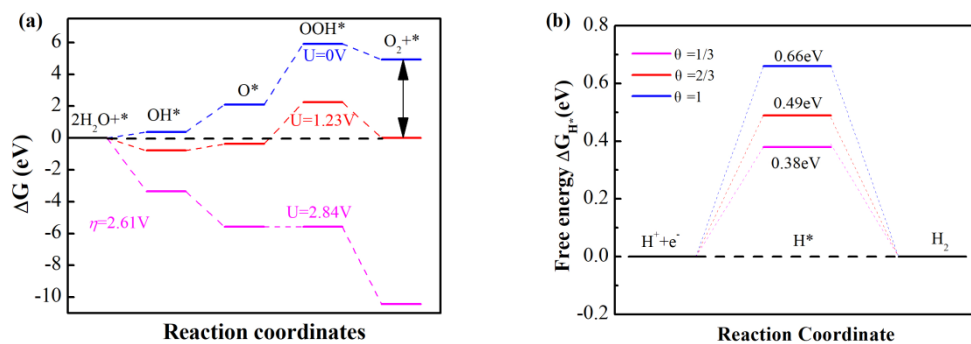

**Figure S8.** The calculated free energy diagrams of (a) OER on  $\text{Cr}_2\text{CO}_2$  surface and (b) HER on  $\text{Ni}_2\text{P}$  surface. For  $\text{Ni}_2\text{P}$   $2 \times 2$  supercell, there are three Ni atoms, and different H coverage can be set as increment of  $1/3$ .

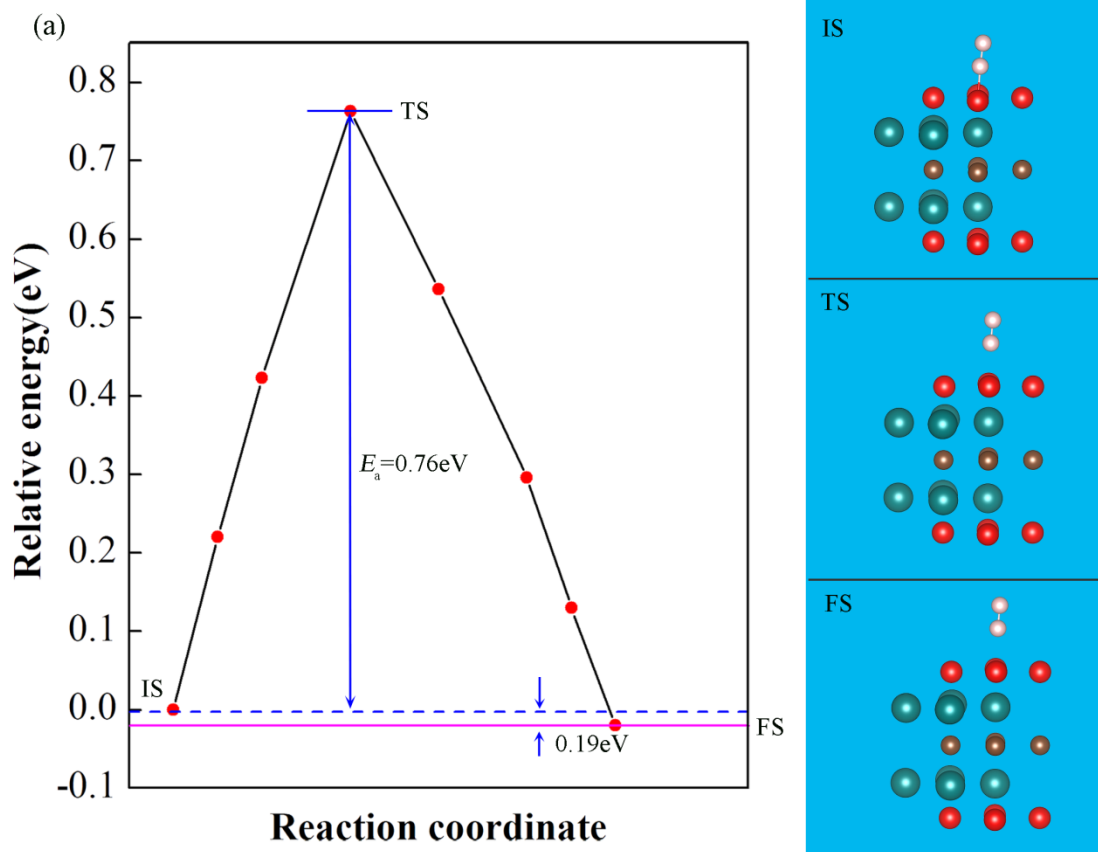

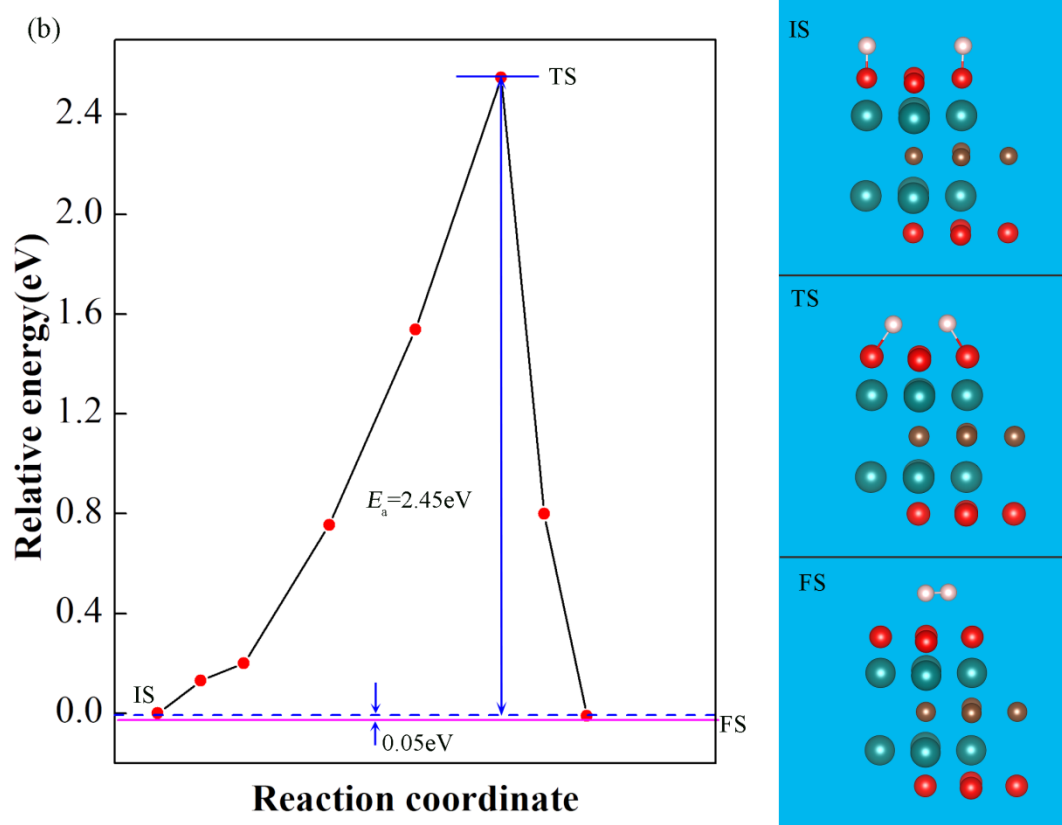

**Figure S9.** The calculated minimum-energy pathway and the activation energy of  $\text{Cr}_2\text{CO}_2$ . (a) Volmer-Heyrovsky reaction, (b) Volmer-Tafel reaction. In The right panels are show the initial state (IS), transition state (TS) and final state (FS). The green, red, coffee and light pink balls represent the Cr, O, C and H atoms, respectively.

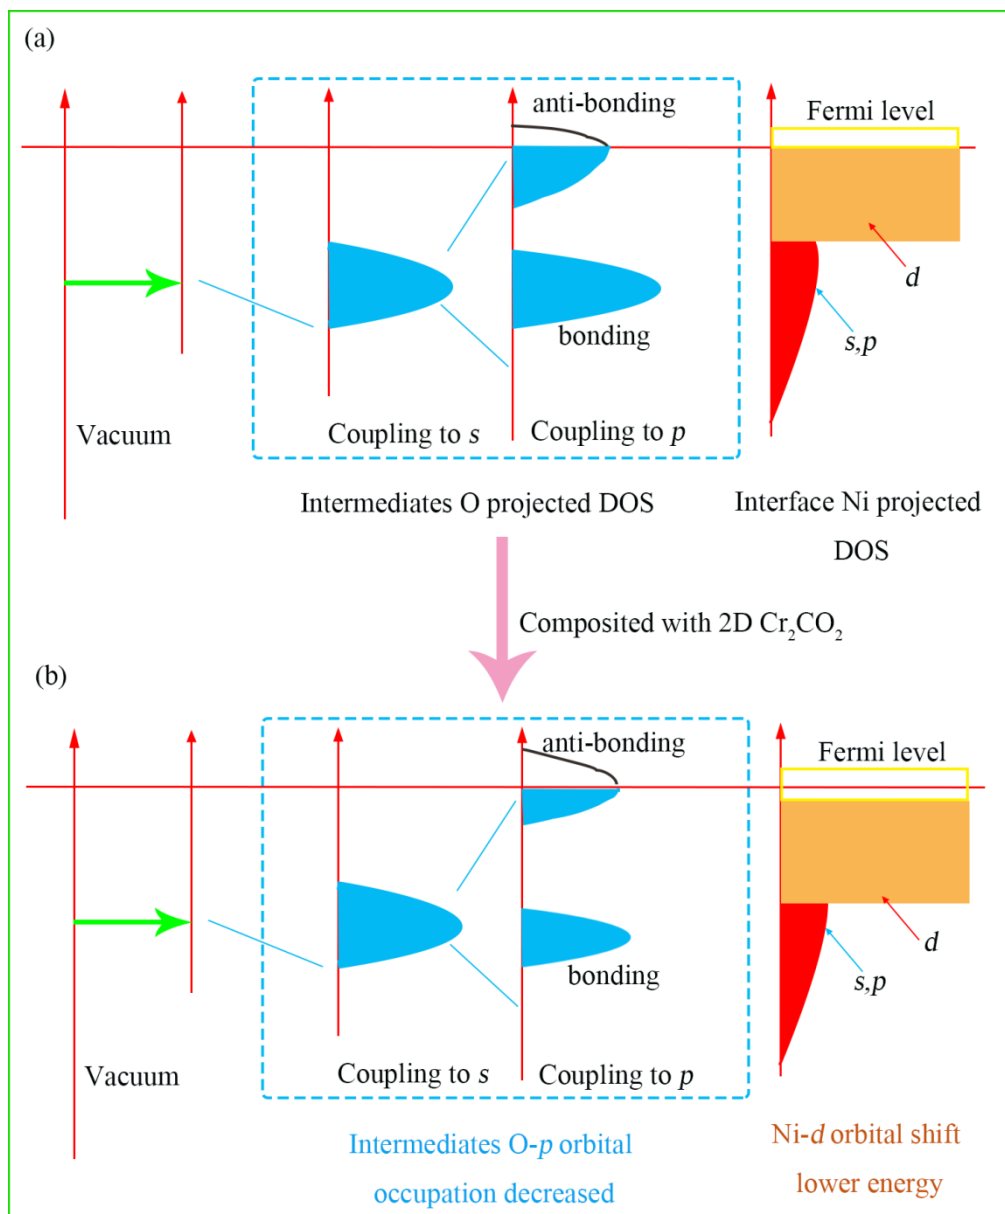

**Figure S10.** Schematic illustration the changed of the Ni  $d$ -orbital of  $\text{Ni}_2\text{P}$ , and O  $p$ -orbital of intermediate after with and without  $\text{Cr}_2\text{CO}_2$  composite.

**Table S1.** The free energy changes of  $\Delta G_{1-4}$  of different  $\text{Ni}_2\text{P}$  surface.

| $\text{Ni}_2\text{P}$ surface System | $\Delta G_1$ | $\Delta G_2$ | $\Delta G_3$ | $\Delta G_4$ |
|--------------------------------------|--------------|--------------|--------------|--------------|
| (001)-I- surface                     | 0.31         | 1.52         | 2.25         | 0.84         |
| (001) -II-surface                    | 1.07         | 1.49         | 2.18         | 0.18         |
| (100) surface                        | 0.37         | 1.05         | 2.76         | 0.74         |
| (102) surface                        | 0.44         | 1.31         | 2.36         | 0.81         |
| (110) surface                        | 0.74         | 1.60         | 2.97         | -0.39        |

**Table S2.** The calculated reaction Gibbs free energies of intermediates via HER and OER on  $\text{Ni}_2\text{P}/\text{Cr}_2\text{CO}_2$  interface with and without considerate the Ni magnetic, respectively. The unit of  $\Delta G$  is eV.

| $\text{Ni}_2\text{P}/\text{Cr}_2\text{CO}_2$ interface | $\Delta G_{*H} \theta = 1/8$ | $\Delta G_{*H} \theta = 2/8$ | $\Delta G_{*H} \theta = 2/8$ | $\Delta G_{*H} \theta = 4/8$ | $\Delta G_1$ | $\Delta G_2$ | $\Delta G_3$ | $\Delta G_4$ |
|--------------------------------------------------------|------------------------------|------------------------------|------------------------------|------------------------------|--------------|--------------|--------------|--------------|
| $T_{\text{without Ni magnetic}}^{①}$                   | -0.31                        | -0.09                        | 0.36                         | 0.57                         | 0.84         | 0.97         | 2.03         | 1.08         |
| $T_{\text{with Ni magnetic}}^{①}$                      | -0.35                        | -0.10                        | 0.34                         | 0.53                         | 0.79         | 1.12         | 2.06         | 0.95         |

①  $T_{\text{with Ni magnetic}}$  and  $T_{\text{without Ni magnetic}}$  represent the reaction free energy of  $\text{Ni}_2\text{P}/\text{Cr}_2\text{CO}_2$  interface with adsorption intermediates with and without considerate the Ni magnetic, respectively.

From Table S2, one can concluded that the spin polarization effect is quite weak on the Gibbs free energy of hydrogen adsorption ( $\Delta G_{*H}$ ) on  $\text{Ni}_2\text{P}/\text{Cr}_2\text{CO}_2$  interface, and it would not alter the trend of  $\Delta G_{*H}$  varies with hydrogen coverage, that is, the  $\Delta G_{*H}$  increasing with the increase of hydrogen coverage. The overpotential are 0.10 V and 0.09 V of  $\text{Ni}_2\text{P}/\text{Cr}_2\text{CO}_2$  interface for HER with and without considering spin polarization, respectively. The Gibbs free energies of different intermediates ( $\Delta G_{1-4}$ ) on  $\text{Ni}_2\text{P}/\text{Cr}_2\text{CO}_2$  interface show slight change. The overpotential are 0.83 and 0.80 V with and without considerate Ni magnetic, respectively. Therefore, it can be concluded that the effect of Ni magnetic on the OER and HER of  $\text{Ni}_2\text{P}/\text{Cr}_2\text{CO}_2$  interface is negligible.

## References

- 1 J. K. Nørskov, T. Bligaard, A. Logadottir, J. Kitchin, J. Chen, S. Pandelov and U. Stimming, *J. Electrochem. Soc.* 2005, **152**, J23–J26.
- 2 P. Atkins, *Physical Chemistry*, 10th ed. Oxford University Press: Oxford, U.K., 2014.
- 3 G. Gao, A. P. O'Mullane and A. Du, *ACS Catal.*, 2017, **7**, 494–500.
- 4 T. Hu, Z. J. Li, M. M. Hu, J. M. Wang, Q. M. Hu, Q. Z. Li and X. H. Wang, *J. Phys. Chem. C.*, 2017, **121**, 19254–19261.
- 5 C. Man, H.Y. Su, F. C. Vallejo, H.A. Hansen, J.I. Martínez, N.G. Inoglu, J. Kitchin, T.F. Jaramillo, J.K. Nørskov and J. Rossmeisl, *Chem. Cat. Chem.*, 2011, **3**, 1159–1165.
- 6 M. T. Li, L. P. Zhang, Q. Xu, J. B. Niu and Z. H. Xia, *J. Catal.*, 2014, **314**, 66–72.
- 7 W. Xiao, X. L. Huang, W. D. Song, Y. Yang, T. S. Herng, J. M. Xue, Y. P. Feng and J. Ding, *Nano Energy.*, 2016, **25**, 60–67.
- 8 J.K. Nørskov, J. Rossmeisl, A. Logadottir, L. Lindqvist, J.R. Kitchin, T. Bligaard and H. Jónsson, *J. Phys. Chem. B.*, 2004, **108**, 17886–17892.
- 9 M. Bajdich, M. G. Mota, A. Vojvodic, J. K. Nørskov and A.T. Bell, *J. Am. Chem. Soc.*, 2013, **135**, 13521–13530.
- 10 Y. W. Cheng, F. L. Tang, H. T. Xue, H. X. Liu, B. Gao and Y. D. Feng, *J. Phys. D :Appl. Phys.*, 2016, **49**, 285107.
